# Supplementary material
Source: PubMed Central journal article supplement (PMC384729)

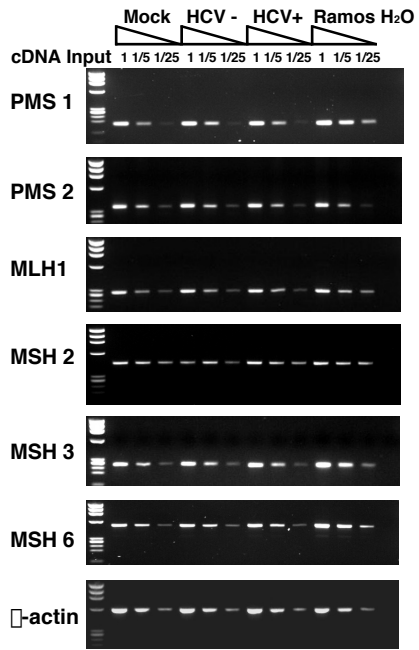

Supplement: pnas_101_12_4262__11.pdf [file pnas_101_12_4262__11.pdf]

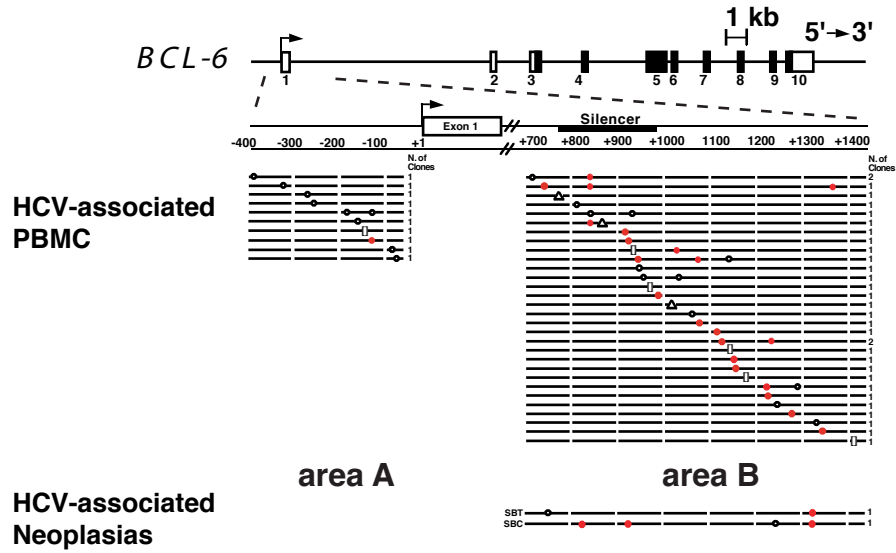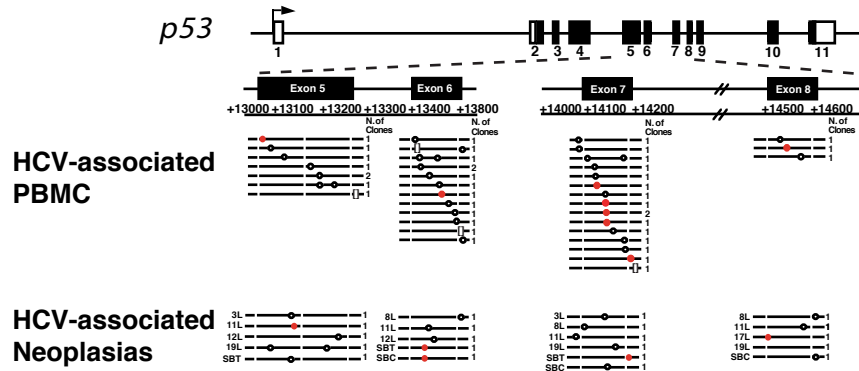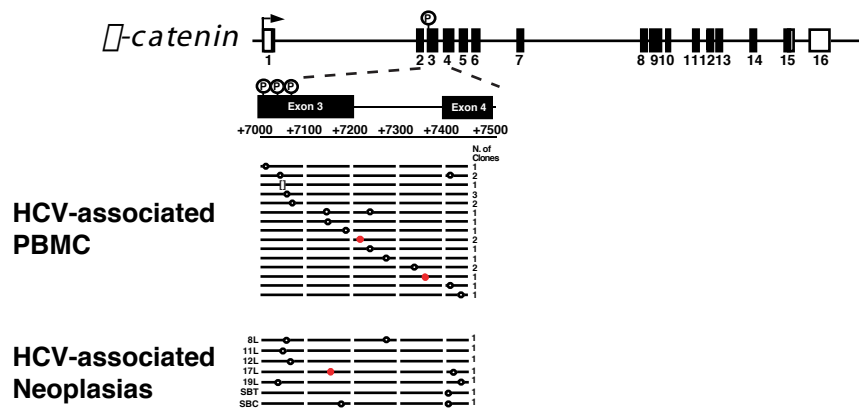

Supplement: pnas_101_12_4262__3.pdf [file pnas_101_12_4262__3.pdf]

**A**

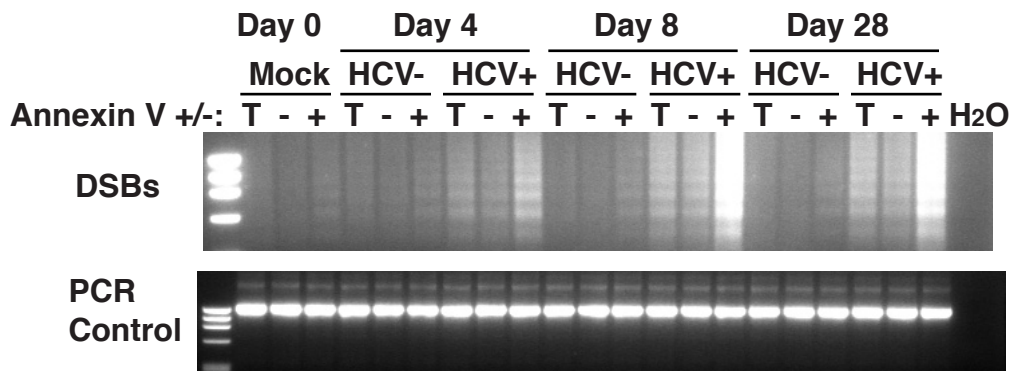

**B**

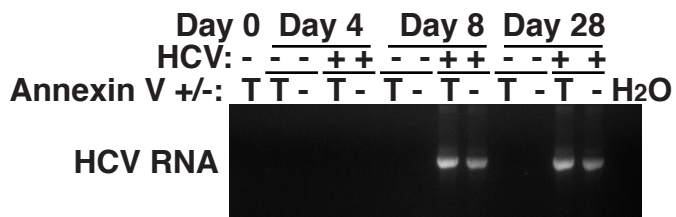

Supplement: pnas_101_12_4262__7.pdf [file pnas_101_12_4262__7.pdf]

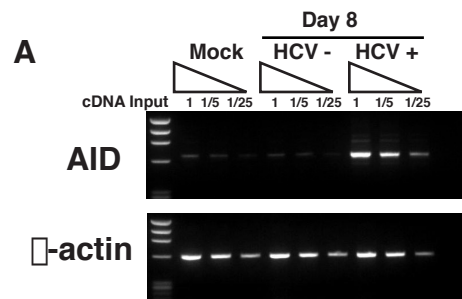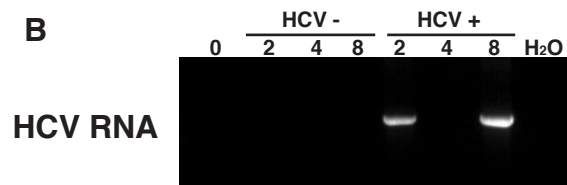

Supplement: pnas_101_12_4262__9.pdf [file pnas_101_12_4262__9.pdf]
